# Supplementary material for: Quality of Life for Polish Women with Ovarian Cancer during First-Line Chemotherapy
Source: MDPI journal article supplement (doi:10.3390/healthcare11182596), 2023-09-21
Supplement: s1 [file s1]

## Supplementary Material

### 1.1. Perception of one's own body domain.

Table S1 presents the results of a multivariate analysis for the scale QLQ-OV28 in perception of one's own body domain.

The multivariate linear regression model showed that:

- age 50-60 reduces the perception of one's own body domain score by an average of 24,627 points in relation to age up to 50 years.

- age 61 and over reduces the perception of one's own body domain score by an average of 28,484 points in relation to age up to 50 years.

- FIGO stage III increases the result on the perception of one's own body domain by an average of 12.96 points in relation to stage II of FIGO scale.

Table S1. Women's quality of life according to the QLQ-OV28 in perception of one's own body domain at I stage

| Variable              |                       | Regression coefficient | 95%CI   |         | p       |
|-----------------------|-----------------------|------------------------|---------|---------|---------|
| Age                   | ≤ 50                  | ref.                   |         |         |         |
|                       | 51-60                 | -24.627                | -42.016 | -7.237  | 0.007 * |
|                       | ≥ 61                  | -28.484                | -46.832 | -10.136 | 0.003 * |
| Marital status        | Single                | ref.                   |         |         |         |
|                       | Married               | -1.447                 | -16.219 | 13.325  | 0.848   |
|                       | Widow                 | -1.447                 | -17.443 | 14.55   | 0.86    |
| Education             | Elementary            | ref.                   |         |         |         |
|                       | Vocational            | -1.88                  | -16.794 | 13.034  | 0.805   |
|                       | Secondary             | -0.767                 | -15.726 | 14.192  | 0.92    |
|                       | Higher                | -13.543                | -31.851 | 4.766   | 0.151   |
| Professional activity | Professionally active | ref.                   |         |         |         |
|                       | Pension               | -1.095                 | -18.023 | 15.834  | 0.899   |
| Comorbidities         | No                    | ref.                   |         |         |         |
|                       | Yes                   | -2.023                 | -11.379 | 7.334   | 0.673   |
| FIGO stage            | II                    | ref.                   |         |         |         |
|                       | III                   | 12.96                  | 2.135   | 23.785  | 0.021 * |
|                       | IV                    | 6.119                  | -11.24  | 23.477  | 0.491   |

p - multiple linear regression\*; statistically significant (p<0.05)

The R<sup>2</sup> coefficient for this model was 22.84%, which means that 22.84% of the variability of the perception of one's own body domain result was explained by the variables included in the model. (Table S1).

### 1.2. Sexuality domain

Table S2 presents the results of a multivariate analysis for the scale QLQ-OV28 in sexuality domain.

The multivariate linear regression model showed that: age 50-60 reduces the sexuality domain score by an average of 8.027 points in relation to age up to 50 years; age 61 and over reduces the sexuality domain score by an average of -9.657 points concerning age up to 50 years.

Table S2. Women's quality of life according to the QLQ-OV28 in sexuality domain at I stage

| Variable              |                       | Regression coefficient | 95%CI   |        | p       |
|-----------------------|-----------------------|------------------------|---------|--------|---------|
| Age                   | ≤ 50                  | ref.                   |         |        |         |
|                       | 51-60                 | -8.027                 | -15.116 | -0.939 | 0.029 * |
|                       | ≥ 61                  | -9.657                 | -17.136 | -2.178 | 0.013 * |
| Marital status        | Single                | ref.                   |         |        |         |
|                       | Married               | 4.249                  | -1.773  | 10.27  | 0.17    |
|                       | Widow                 | -1.448                 | -7.969  | 5.073  | 0.665   |
| Education             | Elementary            | ref.                   |         |        |         |
|                       | Vocational            | -0.618                 | -6.697  | 5.462  | 0.843   |
|                       | Secondary             | -3.417                 | -9.515  | 2.681  | 0.275   |
|                       | Higher                | -1.335                 | -8.798  | 6.129  | 0.727   |
| Professional activity | Professionally active | ref.                   |         |        |         |
|                       | Pension               | -5.25                  | -12.151 | 1.651  | 0.14    |
| Comorbidities         | No                    | ref.                   |         |        |         |
|                       | Yes                   | -1.661                 | -5.475  | 2.153  | 0.396   |
| FIGO stage            | II                    | ref.                   |         |        |         |
|                       | III                   | -3.87                  | -8.283  | 0.543  | 0.089   |
|                       | IV                    | -3.048                 | -10.124 | 4.028  | 0.401   |

p - multiple linear regression,\* statistically significant (p<0.05)

The R<sup>2</sup> coefficient for this model was 40.34%, which means that 40.34% of the variability of the sexuality domain result was explained by the variables included in the model. (Table S2).

### 1.3. Approach to disease/treatment domain

Table S3 presents the results of a multivariate analysis for the scale QLQ-OV28 in approach to disease/treatment domain.

The multivariate linear regression model showed that higher education reduces the result on the approach to disease/treatment domain by an average of 20.312 points compared to primary education.

Table S3. Women's quality of life according to the QLQ-OV28 in approach to disease/treatment domain at I stage

| Variable              |                       | Regression coefficient | 95%CI   |        | p       |
|-----------------------|-----------------------|------------------------|---------|--------|---------|
| Age                   | ≤ 50                  | ref.                   |         |        |         |
|                       | 51-60                 | -13.417                | -31.618 | 4.785  | 0.152   |
|                       | ≥ 61                  | 6.713                  | -12.491 | 25.918 | 0.495   |
| Marital status        | Single                | ref.                   |         |        |         |
|                       | Married               | 0.82                   | -14.642 | 16.281 | 0.917   |
|                       | Widow                 | 4.874                  | -11.87  | 21.618 | 0.57    |
| Education             | Elementary            | ref.                   |         |        |         |
|                       | Vocational            | -7.815                 | -23.425 | 7.796  | 0.329   |
|                       | Secondary             | -5.699                 | -21.356 | 9.959  | 0.478   |
|                       | Higher                | -20.312                | -39.476 | -1.148 | 0.041 * |
| Professional activity | Professionally active | ref.                   |         |        |         |
|                       | Pension               | -6.544                 | -24.263 | 11.175 | 0.471   |
| Comorbidities         | No                    | ref.                   |         |        |         |
|                       | Yes                   | -3.89                  | -13.684 | 5.903  | 0.438   |
| FIGO stage            | II                    | ref.                   |         |        |         |
|                       | III                   | 10.656                 | -0.674  | 21.987 | 0.069   |
|                       | IV                    | 16.122                 | -2.047  | 34.291 | 0.086   |

p - multiple linear regression,\* statistically significant (p<0.05)

The R<sup>2</sup> coefficient for this model was 19.87%, which means that 19.87% of the variability of the approach to disease/treatment domain result was explained by the variables included in the model. (Table S3).

#### 1.4. Gastrointestinal symptoms domain

Table S4 presents the results of a multivariate analysis for the scale QLQ-OV28 in gastrointestinal symptoms domain.

The multivariate linear regression model showed that higher education reduces the result on the gastrointestinal symptoms domain by an average of 18.507 points compared to primary education.

Table S4. Women's quality of life according to the QLQ-OV28 in gastrointestinal symptoms domain at I stage

| Variable              |                       | Regression coefficient | 95%CI   |        | p       |
|-----------------------|-----------------------|------------------------|---------|--------|---------|
| Age                   | ≤ 50                  | ref.                   |         |        |         |
|                       | 51-60                 | -6.861                 | -22.81  | 9.088  | 0.401   |
|                       | ≥ 61                  | 3.054                  | -13.774 | 19.882 | 0.723   |
| Marital status        | Single                | ref.                   |         |        |         |
|                       | Married               | -5.219                 | -18.767 | 8.329  | 0.452   |
|                       | Widow                 | -4.163                 | -18.835 | 10.509 | 0.58    |
| Education             | Elementary            | ref.                   |         |        |         |
|                       | Vocational            | -10.322                | -24     | 3.357  | 0.143   |
|                       | Secondary             | -9.291                 | -23.01  | 4.429  | 0.188   |
|                       | Higher                | -18.507                | -35.299 | -1.715 | 0.033 * |
| Professional activity | Professionally active | ref.                   |         |        |         |
|                       | Pension               | 4.378                  | -11.148 | 19.905 | 0.582   |
| Comorbidities         | No                    | ref.                   |         |        |         |
|                       | Yes                   | 1.5                    | -7.081  | 10.082 | 0.733   |
| FIGO stage            | II                    | ref.                   |         |        |         |
|                       | III                   | 5.594                  | -4.334  | 15.522 | 0.272   |
|                       | IV                    | 7.945                  | -7.976  | 23.865 | 0.331   |

p - multiple linear regression,\* statistically significant (p<0.05)

The R<sup>2</sup> coefficient for this model was 20.40%, which means that 20.40% of the variability of the gastrointestinal symptoms domain result was explained by the variables included in the model. (Table S4).

### 1.5. Peripheral neuropathy domain

Table S5 presents the results of a multivariate analysis for the scale QLQ-OV28 in peripheral neuropathy domain.

The multivariate linear regression model showed that:

- secondary education reduces the result on the peripheral neuropathy domain by an average of 16.777 points concerning primary education.

Table S5. Women's quality of life according to the QLQ-OV28 in peripheral neuropathy domain at I stage

| Variable |       | Regression coefficient | 95%CI   |        | p     |
|----------|-------|------------------------|---------|--------|-------|
| Age      | ≤ 50  | ref.                   |         |        |       |
|          | 51-60 | -2.808                 | -20.257 | 14.641 | 0.753 |
|          | ≥ 61  | -3.785                 | -22.196 | 14.626 | 0.688 |

| Variable              |                       | Regression coefficient | 95%CI   |        | p       |
|-----------------------|-----------------------|------------------------|---------|--------|---------|
| Marital status        | Single                | ref.                   |         |        |         |
|                       | Married               | -6.256                 | -21.078 | 8.566  | 0.41    |
|                       | Widow                 | 6.139                  | -9.913  | 22.191 | 0.456   |
| Education             | Elementary            | ref.                   |         |        |         |
|                       | Vocational            | -12.93                 | -27.896 | 2.035  | 0.094   |
|                       | Secondary             | -16.777                | -31.787 | -1.766 | 0.031 * |
|                       | Higher                | -16.965                | -35.337 | 1.407  | 0.074   |
| Professional activity | Professionally active | ref.                   |         |        |         |
|                       | Pension               | 5.782                  | -11.205 | 22.769 | 0.506   |
| Comorbidities         | No                    | ref.                   |         |        |         |
|                       | Yes                   | 3.822                  | -5.566  | 13.211 | 0.427   |
| FIGO stage            | II                    | ref.                   |         |        |         |
|                       | III                   | -3.585                 | -14.447 | 7.277  | 0.519   |
|                       | IV                    | -9.426                 | -26.844 | 7.992  | 0.292   |

p - multiple linear regression;\* statistically significant (p<0.05)

The R<sup>2</sup> coefficient for this model was 19.47%, which means that 19.47% of the variability of the peripheral neuropathy domain result was explained by the variables included in the model. (Table S5).

#### 1.6 Hormonal /menopausal symptoms domain

Table S6 presents the results of a multivariate analysis for the scale QLQ-OV28 in hormonal /menopausal symptoms domain. The multivariate linear regression model showed that:

- age 50-60 reduces the score on the hormonal /menopausal symptoms domain by an average of 17.118 points in relation to age up to 50 years;
- age 61 and over reduces the score on the hormonal /menopausal symptoms domain by an average of 24.799 points in relation to age up to 50 years;
- widowhood reduces the score on the hormonal /menopausal symptoms domain by an average of 13.8 points concerning virginity.

Table S6. Women's quality of life according to the QLQ-OV28 in hormonal /menopausal symptoms domain at I stage

| Variable |      | Regression coefficient | 95%CI | p |
|----------|------|------------------------|-------|---|
| Age      | ≤ 50 | ref.                   |       |   |

| Variable              |                       | Regression coefficient | 95%CI   |         | p       |
|-----------------------|-----------------------|------------------------|---------|---------|---------|
|                       | 51-60                 | -17.118                | -30.239 | -3.996  | 0.012 * |
|                       | ≥ 61                  | -24.799                | -38.644 | -10.954 | 0.001 * |
| Marital status        | Single                | ref.                   |         |         |         |
|                       | Married               | -3.481                 | -14.627 | 7.666   | 0.542   |
|                       | Widow                 | -13.8                  | -25.871 | -1.729  | 0.028 * |
| Education             | Elementary            | ref.                   |         |         |         |
|                       | Vocational            | 0.719                  | -10.535 | 11.973  | 0.901   |
|                       | Secondary             | -2.402                 | -13.69  | 8.886   | 0.678   |
|                       | Higher                | -7.534                 | -21.35  | 6.281   | 0.288   |
| Professional activity | Professionally active | ref.                   |         |         |         |
|                       | Pension               | -3.094                 | -15.868 | 9.68    | 0.636   |
| Comorbidities         | No                    | ref.                   |         |         |         |
|                       | Yes                   | -0.494                 | -7.555  | 6.566   | 0.891   |
| FIGO stage            | II                    | ref.                   |         |         |         |
|                       | III                   | 8.032                  | -0.137  | 16.2    | 0.057   |
|                       | IV                    | 0.814                  | -12.284 | 13.912  | 0.903   |

p - multiple linear regression,\* statistically significant (p<0.05)

The R<sup>2</sup> coefficient for this model was 39.25%, which means that 39.25% of the variability of the hormonal /menopausal symptoms domain result was explained by the variables included in the model. (Table S6).

#### 1.7. Other side effects of chemotherapy domain

Table S7 presents the results of a multivariate analysis for the scale QLQ-OV28 in hormonal /menopausal symptoms domain. The multivariate linear regression model showed that higher education reduces the score on the other side effects of chemotherapy domain by an average of 17.223 points about primary education.

Table S7. Women's quality of life according to the QLQ-OV28 in other side effects of chemotherapy domain at I stage

| Variable       |         | Regression coefficient | 95%CI   |        | p     |
|----------------|---------|------------------------|---------|--------|-------|
| Age            | ≤ 50    | ref.                   |         |        |       |
|                | 51-60   | -1.276                 | -14.957 | 12.406 | 0.855 |
|                | ≥ 61    | 6.668                  | -7.768  | 21.103 | 0.368 |
| Marital status | Single  | ref.                   |         |        |       |
|                | Married | 4.088                  | -7.534  | 15.71  | 0.492 |

| Variable              |                       | Regression coefficient | 95%CI   |        | p       |
|-----------------------|-----------------------|------------------------|---------|--------|---------|
| Education             | Widow                 | 10.602                 | -1.984  | 23.188 | 0.102   |
|                       | Elementary            | ref.                   |         |        |         |
|                       | Vocational            | -8.582                 | -20.316 | 3.152  | 0.155   |
|                       | Secondary             | -9.222                 | -20.991 | 2.547  | 0.128   |
|                       | Higher                | -17.223                | -31.627 | -2.818 | 0.021 * |
| Professional activity | Professionally active | ref.                   |         |        |         |
|                       | Pension               | 2.11                   | -11.209 | 15.429 | 0.757   |
| Comorbidities         | No                    | ref.                   |         |        |         |
|                       | Yes                   | 2.617                  | -4.744  | 9.978  | 0.488   |
| FIGO stage            | II                    | ref.                   |         |        |         |
|                       | III                   | -0.304                 | -8.82   | 8.213  | 0.944   |
|                       | IV                    | 5.965                  | -7.692  | 19.622 | 0.394   |

p - multiple linear regression;\* statistically significant (p<0.05)

The R<sup>2</sup> coefficient for this model was 26.59%, which means that 26.59% of the variability of the other side effects of chemotherapy domain result was explained by the variables included in the model.(Table S7).

### 1.8. Hair loss domain

Table S8 presents the results of a multivariate analysis for the scale QLQ-OV28 in hair loss domain. The multivariate linear regression model showed that:

- age of 50-60 years reduces the result on the hair loss domain by an average of 17.059 points compared to the age of up to 50 years;
- age 61 and over reduces the score on the hair loss domain by an average of 18.103 points compared to age up to 50;
- secondary education reduces the result on the hair loss domain by an average of 19.65 points (because the regression parameter is -19.65) compared to primary education;
- higher education reduces the result on the hair loss domain by an average of 20.362 points compared to primary education.

Table S8. Women's quality of life according to the QLQ-OV28 in hair loss domain at I stage

| Variable |       | Regression coefficient | 95%CI   |        | p       |
|----------|-------|------------------------|---------|--------|---------|
| Age      | ≤ 50  | ref.                   |         |        |         |
|          | 51-60 | -17.059                | -33.19  | -0.929 | 0.041 * |
|          | ≥ 61  | -18.103                | -35.123 | -1.083 | 0.04 *  |

| Variable              |                       | Regression coefficient | 95%CI   |        | p       |
|-----------------------|-----------------------|------------------------|---------|--------|---------|
| Marital status        | Single                | ref.                   |         |        |         |
|                       | Married               | 2.686                  | -11.016 | 16.389 | 0.702   |
|                       | Widow                 | -0.369                 | -15.208 | 14.47  | 0.961   |
| Education             | Elementary            | ref.                   |         |        |         |
|                       | Vocational            | -9.97                  | -23.805 | 3.865  | 0.161   |
|                       | Secondary             | -19.65                 | -33.526 | -5.774 | 0.007 * |
|                       | Higher                | -20.362                | -37.346 | -3.379 | 0.021 * |
| Professional activity | Professionally active | ref.                   |         |        |         |
|                       | Pension               | 6.204                  | -9.499  | 21.908 | 0.441   |
| Comorbidities         | No                    | ref.                   |         |        |         |
|                       | Yes                   | 0.121                  | -8.558  | 8.8    | 0.978   |
| FIGO stage            | II                    | ref.                   |         |        |         |
|                       | III                   | -2.064                 | -12.106 | 7.977  | 0.688   |
|                       | IV                    | -2.634                 | -18.736 | 13.468 | 0.749   |

p - multiple linear regression,\* statistically significant (p<0.05)

The R<sup>2</sup> coefficient for this model was 16.63%, which means that 16.63% of the variability of the hair loss domain result was explained by the variables included in the model. (Table S8).
